# Supplementary material
Source: publisher figshare collection journal article supplement (https://sage.figshare.com/ndownloader/files/18037937)

**Appendix 5.** Scatter plot showing Pearson's correlation coefficient  $R$  with  $p$ -value and confidence interval of the correlation between host tree species richness and epiphyte species richness per plot.

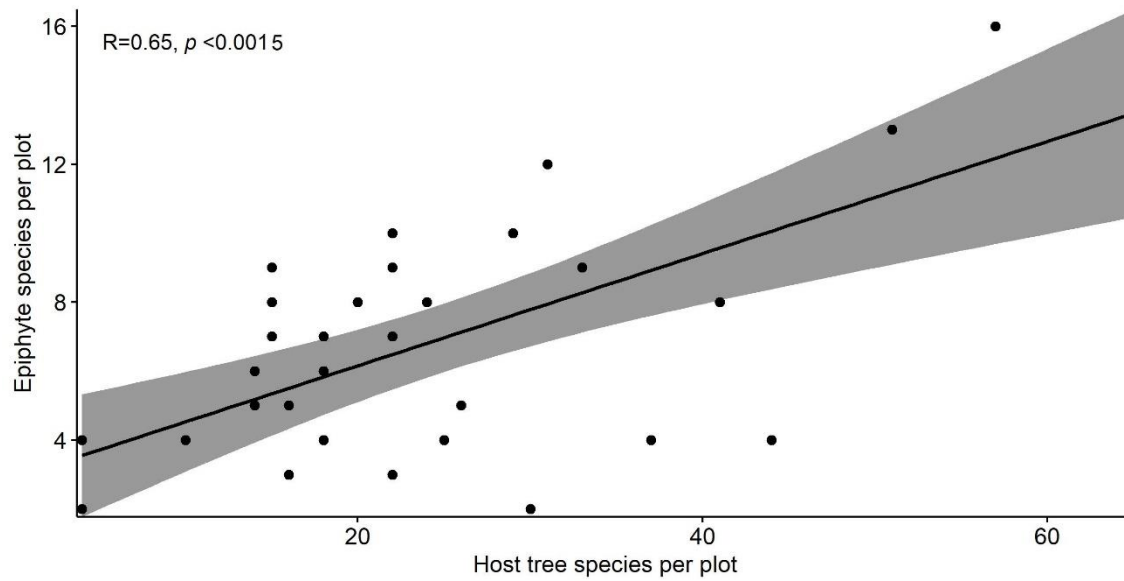

Supplement: Supplementary file 1 [file 18037937]
